## RESEARCH ARTICLE

# The tumor suppressor APC differentially regulates multiple $\beta$ -catenins through the function of axin and CK1 $\alpha$ during *C. elegans* asymmetric stem cell divisions

Austin T. Baldwin and Bryan T. Phillips\*

**ABSTRACT**

The APC tumor suppressor regulates diverse stem cell processes including gene regulation through Wnt– $\beta$ -catenin signaling and chromosome stability through microtubule interactions, but how the disparate functions of APC are controlled is not well understood. Acting as part of a Wnt– $\beta$ -catenin pathway that controls asymmetric cell division, *Caenorhabditis elegans* APC, APR-1, promotes asymmetric nuclear export of the  $\beta$ -catenin WRM-1 by asymmetrically stabilizing microtubules. Wnt function also depends on a second  $\beta$ -catenin, SYS-1, which binds to the *C. elegans* TCF POP-1 to activate gene expression. Here, we show that APR-1 regulates SYS-1 levels in asymmetric stem cell division, in addition to its known role in lowering nuclear levels of WRM-1. We demonstrate that SYS-1 is also negatively regulated by the *C. elegans* homolog of casein kinase 1 $\alpha$  (CK1 $\alpha$ ), KIN-19. We show that KIN-19 restricts APR-1 localization, thereby regulating nuclear WRM-1. Finally, the polarity of APR-1 cortical localization is controlled by PRY-1 (*C. elegans* Axin), such that PRY-1 controls the polarity of both SYS-1 and WRM-1 asymmetries. We propose a model whereby Wnt signaling, through CK1 $\alpha$ , regulates the function of two distinct pools of APC – one APC pool negatively regulates SYS-1, whereas the second pool stabilizes microtubules and promotes WRM-1 nuclear export.

**KEY WORDS:** APC, *C. elegans*, SYS-1, WRM-1, Wnt,  $\beta$ -catenin

**INTRODUCTION**

Asymmetric cell division (ACD) is a fundamental mechanism for controlling cell fate specification and increasing the diversity of cell types during development and adult tissue homeostasis, including stem cell specification (Horvitz and Herskowitz, 1992; Neumüller and Knoblich, 2009). Stem cells self-renew by undergoing ACD to generate a new stem cell and a more differentiated daughter cell (Knoblich, 2008). Consistent with a role in stem cell homeostasis, conserved regulators of ACD are tumor suppressors in mammals, and ACD defects are broadly implicated in human cancers (Cicalese et al., 2009; Morrison and Kimble, 2006; Powell et al., 2010; Quyn et al., 2010). Elucidating the cell signaling pathways that govern ACD will have broad impacts on our understanding of cell fate acquisition and tumorigenesis.

Department of Biology, University of Iowa, 143 Biology Building, Iowa City, IA 52242-1324, USA.

\*Author for correspondence (bryan-phillips@uiowa.edu)

Received 19 November 2013; Accepted 8 April 2014

The Wnt– $\beta$ -catenin pathway has emerged as an important regulator of cell polarity and ACD of stem cells. In this pathway, the secreted Wnt ligand regulates target gene expression by stabilizing the transcriptional coactivator  $\beta$ -catenin, which then translocates into the nucleus to activate the TCF family of transcription factors (MacDonald et al., 2009). When ACD or cell polarity is perturbed in Wnt-regulated stem cells (e.g. mammary, hematopoietic and intestinal stem cells), defects in cell fate and/or tumorigenesis can occur (Cicalese et al., 2009; Quyn et al., 2010; Khramtsov et al., 2010; Reya and Clevers, 2005; Bellis et al., 2012). By contrast, when Wnt is asymmetrically presented to stem cells *in vitro*, the daughter cells of the resultant ACD are asymmetric with respect to the expression of Wnt target genes (Habib et al., 2013), providing evidence that Wnt is sufficient to drive ACD in mammals. A commonly mutated Wnt signaling gene found in familial and sporadic colon cancers is adenomatous polyposis coli (APC). APC is a multifunctional protein that is well known for its role in the negative regulation of  $\beta$ -catenin, although APC has other roles in the regulation of microtubule stability that are also perturbed in colon cancer (Clevers and Nusse, 2012; Brocardo and Henderson, 2008; Green and Kaplan, 2003; Barth et al., 2008; Zumbunn et al., 2001; Nakamura et al., 2001). Although much is known about APC function in the regulation of  $\beta$ -catenin stability during Wnt signaling, the mechanisms that control the multiple functions of APC during asymmetric stem cell divisions are unclear.

*Caenorhabditis elegans* is well suited for elucidating the mechanisms of Wnt– $\beta$ -catenin signaling in *in vivo* asymmetric stem cell divisions, because a Wnt– $\beta$ -catenin signaling pathway, known as the Wnt– $\beta$ -catenin asymmetry (W $\beta$ A) pathway, induces serial asymmetric divisions throughout *C. elegans* invariant development (for reviews see Phillips and Kimble, 2009; Sawa, 2012) and because the cells in question are amenable to *in vivo* observations and perturbations. W $\beta$ A directs differential cell fate determination during ACD by regulating the asymmetric distribution of Wnt signaling components before and during cell division. A primary target of the W $\beta$ A pathway is SYS-1, a transcriptionally active  $\beta$ -catenin. SYS-1 levels are downregulated in Wnt-independent daughter cells and upregulated in Wnt-dependent daughters (Kidd et al., 2005; Phillips et al., 2007; Huang et al., 2007). SYS-1 asymmetry is a crucial polarity readout that results in asymmetric cell fate. Therefore, understanding how SYS-1 is regulated is crucial for understanding the output of the W $\beta$ A pathway. Several lines of evidence suggest that SYS-1 protein is asymmetrically degraded: (1) a SYS-1 transcriptional reporter localizes symmetrically to daughter cells, indicating that SYS-1 expression is not regulated at the level of transcription or mRNA processing (Phillips et al., 2007); (2) SYS-1 localizes symmetrically to the centrosomes

during metaphase and anaphase, indicating that SYS-1 protein is initially loaded equally into anterior and posterior regions of the dividing mother cell (Phillips et al., 2007; Huang et al., 2007); and (3) RNAi depletion of a proteasome component results in increased SYS-1 levels in an anterior embryonic daughter cell (Huang et al., 2007), indicating that protein degradation is required for the loss of SYS-1 in Wnt pathway-inactive cells. Therefore, SYS-1 and mammalian  $\beta$ -catenin appear to be regulated by the same general processes. However, for SYS-1 regulation, the role of the destruction complex including APC is largely unknown.

During *C. elegans* ACD, APC indirectly regulates the *C. elegans* TCF POP-1, by stabilizing microtubules and promoting the nuclear export of a second  $\beta$ -catenin, WRM-1 (Fig. 1; Sugioka et al., 2011; Rocheleau et al., 1999; Lo et al., 2004; Yang et al., 2011). WRM-1 does not activate POP-1/TCF transcription but, instead, facilitates POP-1 phosphorylation by Nemo-like kinase and subsequent POP-1 nuclear export in signaled daughters (Korswagen et al., 2000). In the Wnt-independent daughter cell, nuclear levels of WRM-1 are lowered by APC-dependent microtubule-mediated nuclear export, leading to decreased nuclear WRM-1 levels compared with the Wnt-dependent daughter cell. Wnt signaling inhibits APC and microtubule stability in the Wnt-dependent daughter, leading to elevated nuclear WRM-1 and decreased POP-1 (Sugioka et al., 2011). The resulting reciprocal asymmetry of SYS-1 and POP-1 gives rise to one nucleus with a low SYS-1:POP-1 ratio that results in target gene repression (the Wnt-independent daughter) and another nucleus with a high SYS-1:POP-1 ratio that results in Wnt target gene activation (the Wnt-dependent daughter; Fig. 1; Jackson and Eisenmann, 2012). Whether and to what extent the W $\beta$ A branches that control POP-1 and SYS-1 asymmetries intersect remains uncertain, primarily because SYS-1 regulation is poorly understood compared with POP-1 regulation.

The *C. elegans* epithelial seam cells are especially amenable to the analysis of Wnt-mediated control of stem cell fate and  $\beta$ -catenin regulation. These visually accessible cells repeatedly

divide asymmetrically in a stem-cell-like pattern during larval development, and cell fate determination for each of these divisions is dependent on the W $\beta$ A pathway (supplementary material Fig. S1; Mizumoto and Sawa, 2007; Kanamori et al., 2008; Huang et al., 2009; Banerjee et al., 2010; Gleason and Eisenmann, 2010; Ren and Zhang, 2010; Harterink et al., 2011; Yamamoto et al., 2011; Gorrepati et al., 2013; Hughes et al., 2013). Thus, the lineage maintains a constant number of seam cells (posterior W $\beta$ A-signaled daughters) while increasing the number of hypodermal nuclei (anterior Wnt-independent daughters). Activation or repression of W $\beta$ A results in increased or decreased seam cell numbers, respectively. At least one direct target of SYS-1 and POP-1, EGL-18, is also differentially expressed in the seam daughters; EGL-18 expression is elevated in the posterior cell with a high SYS-1:POP-1 ratio and is reduced or absent in the anterior daughter with a low SYS-1:POP-1 ratio (Gorrepati et al., 2013). Other recent studies have analyzed the genetics of Wnt signaling components in *C. elegans* and the effects these components have on seam cell number, providing several potential regulators of SYS-1 asymmetry (Huang et al., 2009; Banerjee et al., 2010; Gleason and Eisenmann, 2010; Ren and Zhang, 2010).

Vertebrate  $\beta$ -catenin negative regulation requires the APC scaffold, which represents a candidate SYS-1 regulator. Loss of APC function results in inappropriate  $\beta$ -catenin stabilization and tumorigenesis in mammals (Clevers and Nusse, 2012). Loss of the *C. elegans* APC homolog, APR-1, also results in the inappropriate expansion of a stem cell population, in this case the worm seam cells. APR-1 regulates the asymmetric nuclear localization of WRM-1 during ACD; however, as discussed above, studies in the embryo indicate that APR-1 accomplishes this not by binding directly to WRM-1 but, instead, through asymmetric stabilization of astral microtubules that then control WRM-1 nuclear export (Sugioka et al., 2011; Mizumoto and Sawa, 2007). In order to affect asymmetric microtubule stability, APR-1 displays Wnt-dependent asymmetric localization to the anterior cortex of seam cells (Fig. 1; Sugioka et al., 2011; Mizumoto and Sawa, 2007). Finally, knocking down APR-1 expression by using RNAi [*apr-1(RNAi)*] results in symmetrical SYS-1 localization in the nuclei of asymmetrically dividing embryonic cells, raising the possibility that APR-1 might also regulate SYS-1 asymmetry in the seam cells (Fig. 1; Huang et al., 2007).

Because APC regulation of  $\beta$ -catenin in the canonical Wnt pathway requires  $\beta$ -catenin phosphorylation by CKI $\alpha$ , the worm homolog of CKI $\alpha$ , KIN-19, is also a candidate SYS-1 negative regulator. In mammals, CKI $\alpha$  phosphorylates  $\beta$ -catenin and APC, priming both proteins for additional phosphorylation by GSK3 $\beta$ , after which  $\beta$ -catenin is bound by APC and degraded (Clevers and Nusse, 2012; Price, 2006). *kin-19(RNAi)* results in more than double the average number of seam cells found in a wild-type worm, indicating that KIN-19 acts as a negative regulator of seam cell fate (Banerjee et al., 2010; Gleason and Eisenmann, 2010). Interestingly, loss of the worm homolog of GSK3 $\beta$ , GSK-3, alone or in combination with other W $\beta$ A pathway members, does not cause defects in seam cell number, indicating that KIN-19, unlike mammalian CKI $\alpha$ , regulates cell fate independently of GSK3 $\beta$  (Banerjee et al., 2010; Gleason and Eisenmann, 2010). However, the identity of the KIN-19 targets during W $\beta$ A signaling is unclear because there are two  $\beta$ -catenins, SYS-1 and WRM-1, that cooperate to properly specify seam cell fate – the *kin-19(RNAi)* seam cell hyperplasia phenotype is dependent on the

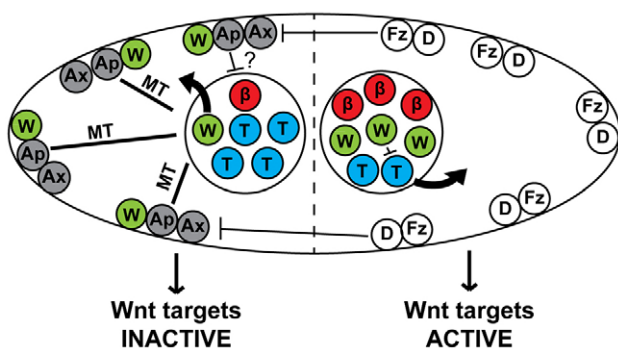

**Fig. 1. A model of the W $\beta$ A pathway in the epithelial seam stem cells.** Negative regulators of the TCF-export pathway (PRY-1/Axin, APR-1/APC) are localized to the anterior cortex by positive regulators of Wnt signaling on the posterior cortex (Frizzled, Disheveled). APR-1/APC stabilizes microtubules (MT) in the anterior daughter to increase WRM-1/ $\beta$ -catenin nuclear export and cortical localization. Higher nuclear levels of WRM-1/ $\beta$ -catenin in the posterior daughter cell facilitate POP-1/TCF nuclear export. How SYS-1/ $\beta$ -catenin asymmetry is generated is presently unclear, although previous data indicate that APR-1/APC might be involved (?).  $\beta$ , SYS-1/ $\beta$ -catenin (red); W, WRM-1/ $\beta$ -catenin (green); T, POP-1/TCF (blue); Fz, Frizzled (white); D, Disheveled (white); Ax, PRY-1/Axin (gray); Ap, APR-1/APC (gray).

function of both  $\beta$ -catenins. Therefore, the mechanism by which KIN-19 negatively regulates seam cell fate and how KIN-19 relates to APR-1 function is unknown.

Axin is another major scaffold for  $\beta$ -catenin destruction complex proteins, such as GSK3 $\beta$  and CKI $\alpha$  (Clevers and Nusse, 2012). The *C. elegans* Axin homolog, PRY-1, negatively regulates seam cell fate and canonical Wnt signaling in *C. elegans* (Korswagen et al., 2002; Gleason and Eisenmann, 2010). PRY-1 localizes to the anterior cortex of dividing seam cells, indicating that its function in the seam cells might be involved in the W $\beta$ A pathway (Mizumoto and Sawa, 2007). Unlike *apr-1* loss of function, *pry-1* mutants display normal nuclear localization of WRM-1 in the nuclei of early larval seam cell daughters, although the establishment of cortical WRM-1 asymmetry prior to division can be delayed (Mizumoto and Sawa, 2007). PRY-1 physically interacts with APR-1, and *pry-1* mutants display defects in the cortical asymmetry of APR-1, resulting in a symmetric distribution of APR-1 across the cortex of the mother cell (Korswagen et al., 2002; Mizumoto and Sawa, 2007). However, because WRM-1 nuclear asymmetry defects are not seen in *pry-1* mutants in the V5.p seam cell, the significance of PRY-1 regulation of APR-1 cortical asymmetry and the mechanism underlying PRY-1-mediated negative regulation of seam cell fate are unclear (Mizumoto and Sawa, 2007; Gleason and Eisenmann, 2010).

Here, we examine the role of APC and other members of the  $\beta$ -catenin destruction complex in SYS-1 regulation during asymmetric division of *C. elegans* seam cells. We show that KIN-19 regulates seam cell fate by negative regulation of SYS-1 levels in the anterior seam cell daughter. Additionally, KIN-19 acts as a positive regulator of posterior WRM-1 localization upstream of APR-1 localization. We find that loss of APR-1 function causes a similar defect in SYS-1 negative regulation to loss of KIN-19 function. Interestingly, PRY-1/Axin is not required for the negative regulation of SYS-1 or WRM-1 levels as would be suggested from previous Wnt- $\beta$ -catenin studies. Rather, we demonstrate a novel Axin function in mother cell polarity, because *pry-1* mutants show randomized SYS-1 and WRM-1 localization in seam cell daughters, likely due to mislocalized APR-1. These results establish that APR-1 has two major functions in the seam cells: (1) negatively regulating SYS-1 levels in the anterior daughter in conjunction with KIN-19 and (2) promoting WRM-1 nuclear export in the anterior daughter (Sugioka et al., 2011). *kin-19(RNAi)* divisions show APR-1 mislocalization to the posterior daughter, which results in inappropriate WRM-1 nuclear export but not SYS-1 depletion. Therefore, we propose a model whereby the interaction of APR-1/APC and PRY-1/Axin with KIN-19/CKI $\alpha$  distinguishes between microtubule (and thus WRM-1) and SYS-1 regulatory roles. Taken together, these data reveal multiple functions of APC that are dictated by Wnt signaling during *in vivo* asymmetric stem cell division.

## RESULTS

### SYS-1/ $\beta$ -catenin localization is dynamic during seam cell division

In order to investigate how the components of the W $\beta$ A pathway direct ACD in worms, we established a system to examine ACD *in vivo* by visualizing the distribution of SYS-1, the  $\beta$ -catenin that controls TCF target gene activation, in seam cells. We chose to test this hypothesis in seam cells because many W $\beta$ A components have been genetically determined to positively and negatively

regulate seam cell fate, and the subcellular localization of several pathway members has already been examined. However, as the localization pattern of SYS-1/ $\beta$ -catenin had not yet been determined for seam cell divisions, we first characterized SYS-1 localization during the seam cell cycle. The seam cells divide asymmetrically several times during *C. elegans* development; however, the final asymmetric division during late larval development is the most strongly affected by RNAi for Wnt components and was thus the focus of our studies (Banerjee et al., 2010; Gleason and Eisenmann, 2010). In order to analyze the localization of SYS-1 in the seam cells, we examined the expression pattern of a rescuing *P<sub>sys-1</sub>::YFP::SYS-1* transgene (Fig. 2A–D; Phillips et al., 2007). Between divisions, SYS-1 localized weakly to the cortex and cytoplasm. Prior to metaphase, SYS-1 localized to the nucleus and cytoplasm (Fig. 2A). During metaphase and anaphase, SYS-1 localized to bright puncta that behaved similarly to centrosomes (Fig. 2B). Centrosomal localization was confirmed by the colocalization of mCherry::SYS-1 with GFP-tagged  $\beta$ -tubulin (supplementary material Fig. S2), consistent with SYS-1 centrosomal localization observed in other tissues (Phillips et al., 2007; Huang et al., 2007). Asymmetric localization of SYS-1 was established during early telophase, during which SYS-1 levels were rapidly lowered in the anterior daughter while SYS-1 levels increased in the nuclear region of the posterior daughter (Fig. 2C). SYS-1 asymmetry was maintained after cytokinesis into late telophase when it localized primarily in the nucleus of the posterior daughter (Fig. 2D). Within 1 hour after division, nuclear levels of SYS-1 decreased and localization at the cortex and cytoplasm increased, but SYS-1 eventually became undetectable by 2 hours after division (Fig. 2E). Mutation and/or knockdown of Wnt pathway components has been found to alter fate in all asymmetrically dividing seam cell lineages, further demonstrating that the W $\beta$ A pathway functions in each seam cell lineage (Banerjee et al., 2010; Gleason and Eisenmann, 2010). Consistent with this, SYS-1 localization followed the pattern reported here during all observed seam cell divisions, thus establishing a baseline system to study the function of the W $\beta$ A pathway during ACD. We therefore treated the V seam cells in their final (L4) division as a single unit with regards to SYS-1 function and regulation.

### KIN-19/CKI $\alpha$ and APR-1/APC negatively regulate SYS-1 in the anterior daughter cell

Because KIN-19 and APR-1 negatively regulate seam cell fate and because the identity of SYS-1 negative regulators is a major unanswered question in this pathway, we examined SYS-1 localization after KIN-19 and APR-1 RNAi. Consistent with the published cell fate analyses (Banerjee et al., 2010; Gleason and Eisenmann, 2010), we found that APR-1 and KIN-19 knockdown resulted in symmetric divisions that produced two elongated seam cells, rather than the wild-type pattern of one elongated seam cell and one spherical cell that fuses to the hypodermal syncytium (Fig. 2E,J,O). We observed that SYS-1 levels were higher in the anterior daughters of these symmetric seam cell divisions after *kin-19* and *apr-1* RNAi treatment (Fig. 2I,N). Both *kin-19(RNAi)* and *apr-1(RNAi)* seam cells followed the wild-type localization pattern until metaphase, at which point we observed a noticeable increase in cortical SYS-1 in *kin-19(RNAi)* (Fig. 2G, arrowheads). At telophase in *kin-19(RNAi)* and *apr-1(RNAi)* cells, SYS-1 was inappropriately maintained in the nuclear region of both the anterior and posterior daughters (Fig. 2H,M).

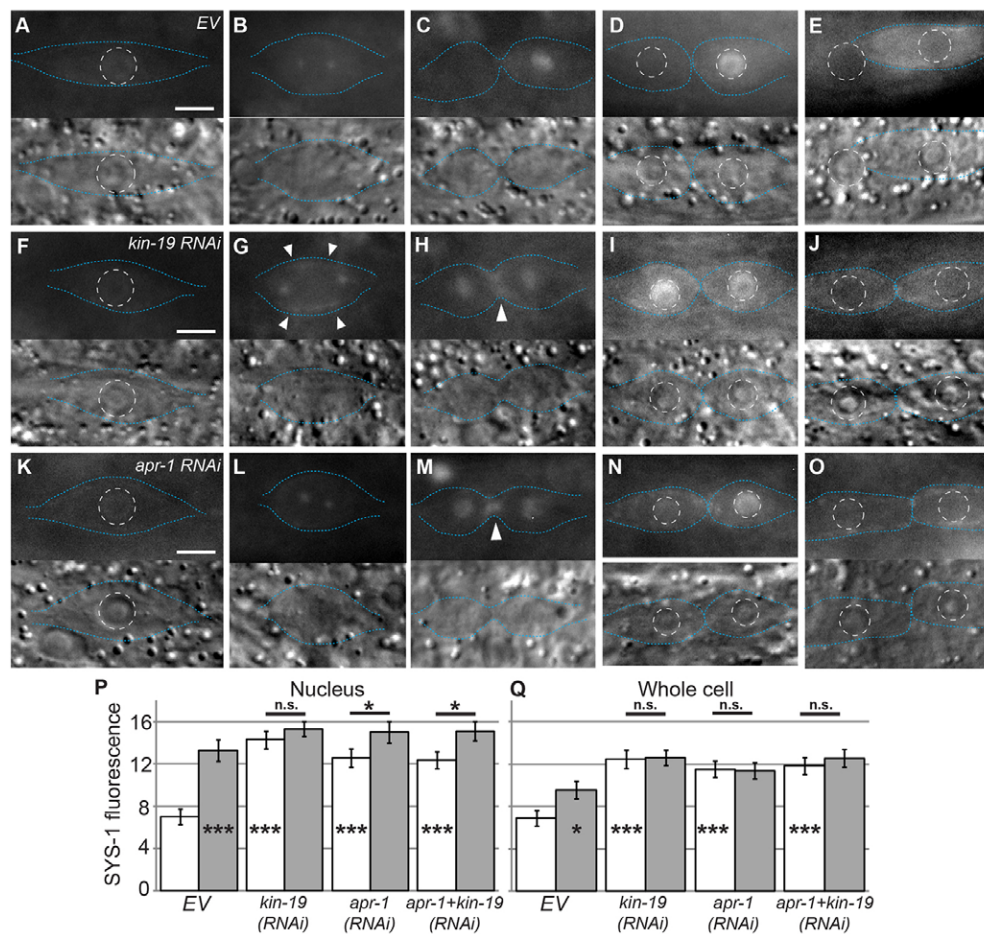

**Fig. 2. KIN-19 and APR-1 are required for asymmetric localization of SYS-1 during seam cell division.** (A–E) YFP::SYS-1 localization in wild-type/empty feeding vector (EV) seam cells. (F–J) YFP::SYS-1 localization in *kin-19(RNAi)* cells. (K–O) YFP::SYS-1 localization in *apr-1(RNAi)* cells. In A–O, the upper images display YFP::SYS-1 and the lower images display the corresponding DIC images. Blue dotted lines, cell boundaries; white dashed circles, nuclear boundaries. Scale bars: 5  $\mu$ m. (A,F,K) Prior to division, SYS-1 localizes to the cortex and nucleus. (B,G,L) During metaphase, SYS-1 localizes to centrosomes in all cells and to the cortex in *kin-19(RNAi)* cells (arrowheads). (C,H,M) Early telophase. In empty-vector controls, SYS-1 localizes asymmetrically to the nuclear regions of the dividing cell. In *kin-19(RNAi)* and *apr-1(RNAi)* cells, SYS-1 localizes symmetrically to the nuclear regions. Arrowheads, cortical SYS-1 localization. (D,I,N) Late telophase. SYS-1 levels in empty-vector control nuclei remain asymmetric. SYS-1 levels in the nuclei of *kin-19(RNAi)* cells remain symmetric. In *apr-1(RNAi)* cells, nuclear levels of SYS-1 become asymmetric, although nuclear levels of SYS-1 in anterior daughters remain higher than those of empty-vector controls. (E,J,O) 1 hour post-division. In controls, the anterior daughter has fused to *hyp7*. In *kin-19(RNAi)* and *apr-1(RNAi)* cells, both daughters have adopted the seam fate. (P,Q) The average nuclear (P) and whole-cell (Q) YFP::SYS-1 fluorescence intensity after telophase. White bars, anterior daughters; gray bars, posterior daughters. The *n* values are as follows: EV, *n*=41; *kin-19(RNAi)*, *n*=28; *apr-1(RNAi)*, *n*=32; *apr-1+kin-19(RNAi)*, *n*=22. Data show the mean $\pm$ s.e.m.; \**P*<0.05; \*\*\**P*<0.001; n.s.*P*>0.05. Asterisks inside columns are a comparison to anterior empty-vector control.

Additionally, unlike wild-type seam cells, *kin-19(RNAi)* and *apr-1(RNAi)* seam cells maintained cortical SYS-1 during division (Fig. 2H,M, arrowheads). Because SYS-1 functions in the nucleus, we quantified SYS-1 fluorescence intensity in anterior and posterior nuclei in wild-type, *kin-19(RNAi)* and *apr-1(RNAi)* worms during late telophase (analogous to Fig. 2D,I,N). YFP::SYS-1 levels were significantly higher in the nuclei of anterior seam cell daughters in *kin-19(RNAi)* and *apr-1(RNAi)* versus control larvae fed empty RNAi vector (EV; Fig. 2P). To account for the observed increases in cortical SYS-1 localization, we also quantified SYS-1 localization over the entire cells and, again, we observed significant increases in SYS-1 levels in both *kin-19(RNAi)* and *apr-1(RNAi)* cells (Fig. 2Q). Interestingly, after *apr-1(RNAi)*, we saw persistent elevation of SYS-1 throughout the entire cell, even though the nuclear elevation was transient (Fig. 2N), which suggests that APR-1 has a heretofore unknown

function in SYS-1 nuclear retention or distribution. Taken together, these data indicate that APR-1 and KIN-19 are major negative regulators of SYS-1 in the anterior seam cell daughters.

If APR-1 acts as a scaffold for the formation of a complex of SYS-1 and KIN-19, then loss of either APR-1 or KIN-19 would be expected to result in identical phenotypes. Alternatively, APR-1 and KIN-19 might represent two distinct mechanisms of SYS-1 negative regulation. To distinguish between these possibilities, we performed a double knockdown of APR-1 and KIN-19 [*apr-1+kin-19(double RNAi)*]. We found that SYS-1 localization in *apr-1+kin-19(double RNAi)* seam cells was similar to that of *apr-1(RNAi)* seam cells (supplementary material Fig. S3A–D), and quantification showed that SYS-1 fluorescence in *apr-1+kin-19(double RNAi)* seam cells and nuclei was not significantly higher than in *apr-1(RNAi)* or *kin-19(RNAi)* cells or nuclei (*P*>0.05, Fig. 2P,Q). Although these animals are likely not null

for KIN-19 or APR-1 function, the lack of enhancement in the double knockdown organisms compared with either single knockdown suggests that APR-1 and KIN-19 are both essential negative regulators of SYS-1 that act in a single pathway in the anterior seam cell daughter; however, the possibility remains that they regulate SYS-1 levels by separate mechanisms.

### PRY-1/Axin loss randomizes SYS-1 localization

Similar to scaffolding by APC, Axin acts as a scaffold in the conserved  $\beta$ -catenin destruction complex alongside CK1 $\alpha$ . Because the *C. elegans* homologs of APC and CK1 $\alpha$  regulate SYS-1/ $\beta$ -catenin levels (above), and because PRY-1/Axin also acts as a negative regulator of seam cell fate (Gleason and Eisenmann, 2010), we investigated PRY-1 as a potential regulator of SYS-1 localization that cooperates with APC during seam cell division. Defects in SYS-1 localization in the seam cells of worms carrying the mutant *pry-1* allele *mu38* [*pry-1(mu38)*] become apparent during telophase (Fig. 3A; supplementary material Fig. S3E–H). Average YFP::SYS-1 fluorescence was significantly lower in the nuclei of both anterior and posterior daughter cells in *pry-1(mu38)* versus wild-type worms (Fig. 3C). However, we observed extensive variability in the degree and polarity of SYS-1 asymmetry between the two *pry-1(mu38)* daughters, so we calculated the difference in fluorescence between posterior and anterior daughter nuclei to estimate the ‘polarity’ of SYS-1 localization. We found that nuclear SYS-1 levels in *pry-1(mu38)* daughter pairs ranged from a complete

reversal of wild-type asymmetry, to symmetry, to an essentially wild-type pattern of localization (Fig. 3A,D). Average SYS-1 levels in *pry-1* mutants were decreased because the level of SYS-1 in the posterior nucleus was occasionally about as high as the average in wild-type, but was never higher and was typically lower. SYS-1 levels in reversed or symmetrical divisions were never as high as those in wild-type posterior daughters. From these data, we conclude that PRY-1 regulates the polarity of SYS-1 localization, but that PRY-1 is not essential for the reduction of SYS-1 levels in the anterior daughter, indicating that PRY-1 is important for establishing the site of SYS-1 negative regulation but not for regulating SYS-1 protein levels directly.

PRY-1 controls the asymmetric cortical localization of APR-1 during an earlier seam cell division (V5.p; Mizumoto and Sawa, 2007), and APR-1 is required for the negative regulation of SYS-1 in later seam cell ACDs (Fig. 2). We therefore tested the hypothesis that the negative regulation of SYS-1 levels in seam cells remains functional in *pry-1* mutants by examining whether the SYS-1 polarity defects observed in *pry-1(mu38)* daughter cells are dependent on APR-1. SYS-1 levels in both daughter nuclei in *pry-1(mu38);apr-1(RNAi)* worms are significantly increased, thus making the divisions more symmetrical compared with those of wild-type or *pry-1(mu38)* organisms, although SYS-1 levels in the posterior daughter are still significantly reduced in *pry-1(mu38);apr-1(RNAi)* compared with wild-type worms (Fig. 3B–D). Above, we have described a ‘nuclear retention’ phenotype that is defective in *apr-1(RNAi)*

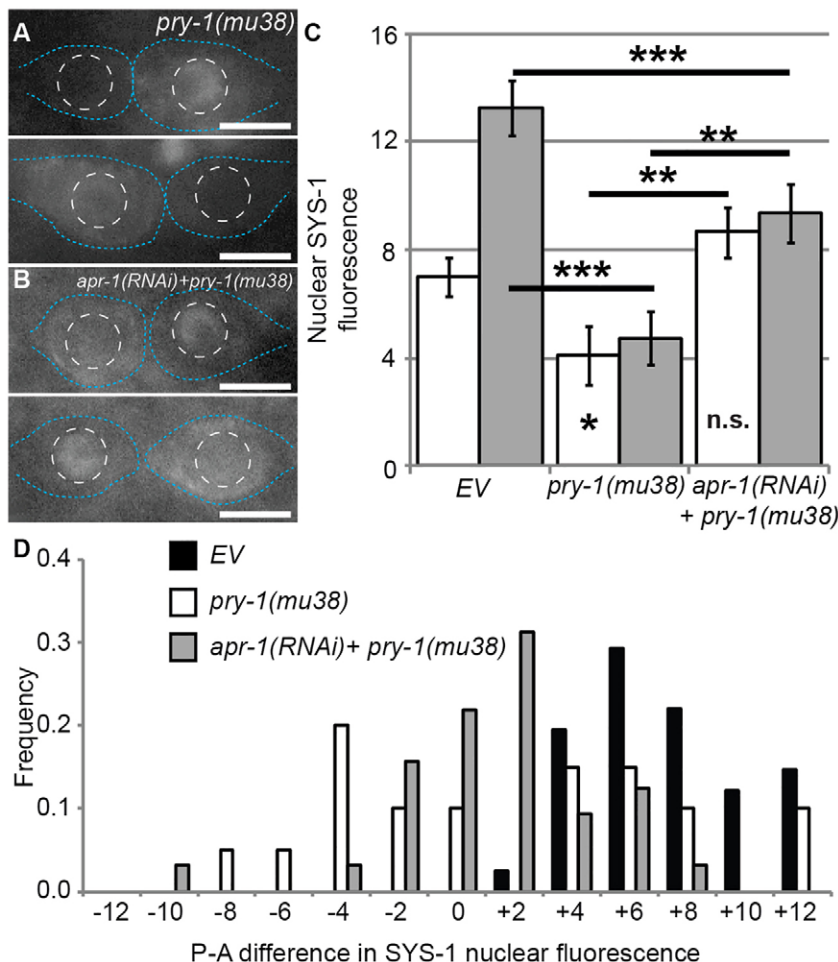

**Fig. 3. PRY-1 controls the polarity of SYS-1**

**asymmetry.** (A) Representative images of YFP::SYS-1 localization in *pry-1(mu38)* seam cell daughters during late telophase. (B) YFP::SYS-1 localization in *pry-1(mu38);apr-1(RNAi)* cells. Blue dotted lines, cell boundaries; white dashed circles, nuclear boundaries. Scale bars: 5  $\mu$ m. (C) Average nuclear YFP::SYS-1 fluorescence intensity after telophase. White bars, anterior daughters; gray bars, posterior daughters. Data show the mean  $\pm$  s.e.m.; \* $P$ <0.05; \*\* $P$ <0.01; \*\*\* $P$ <0.001; n.s.  $P$ >0.05. Asterisks inside columns are a comparison to anterior empty-vector control (EV). Data for the empty-vector control are the same as those shown in Fig. 2, as all experiments were conducted as part of the same cohort. (D) Graph showing the posterior-anterior (P-A) difference in YFP::SYS-1 nuclear fluorescence. The x-axis indicates the difference in posterior and anterior YFP::SYS-1 fluorescence intensity in individual pairs of seam cell daughters, the y-axis indicates the number of daughter pairs with a difference in SYS-1 intensity in a given range. The  $n$  values are as follows: EV,  $n$ =41; *pry-1(mu38)*,  $n$ =20; *apr-1(RNAi) + pry-1(mu38)*,  $n$ =32.

seam cells, where SYS-1 levels were elevated in the anterior daughter but distributed more to the cytoplasm and cortex than the nucleus (Fig. 2N). The cortical pattern of SYS-1 localization in *pry-1(mu38);apr-1(RNAi)* cells resembles that of *apr-1(RNAi)* cells, with the addition of a polarity defect whereby the daughter with higher cortical levels of SYS-1 can be anterior or posterior (Fig. 3B). Because APR-1-dependent SYS-1 negative regulation still occurs in *pry-1* mutants, these data indicate that PRY-1 polarizes the site of SYS-1 negative regulation, likely through APR-1, and that PRY-1 also polarizes the nuclear retention mechanism that becomes apparent after *apr-1(RNAi)*.

### KIN-19, APR-1 and PRY-1 differentially regulate WRM-1 localization

Another potential cause of ACD defects is through the regulation of the WRM-1 branch of the W $\beta$ A pathway and, indeed, the *kin-19* and *apr-1* seam cell hyperplasia phenotypes are dependent upon WRM-1 function (Banerjee et al., 2010; Gleason and Eisenmann, 2010). This could be due to either KIN-19-mediated control of WRM-1 localization, or the fact that the loss of WRM-1 decreases the SYS-1:POP-1 ratio to such an extent that an increase in SYS-1 levels after KIN-19 loss remains insufficient to activate target gene expression. To determine whether KIN-19 and APR-1 regulate the WRM-1–POP-1 branch of the W $\beta$ A pathway, we observed WRM-1 localization in the nuclei of V seam cells after terminal division in *kin-19(RNAi)* and *apr-1(RNAi)* larvae. Levels of WRM-1::YFP fluorescence were significantly lower in the posterior (signaled) daughter nuclei of *kin-19(RNAi)* seam cells compared with those of controls (Fig. 4A,B). Additionally, a visible increase in the level of cortical WRM-1 was observed in the posterior daughter of *kin-19(RNAi)* divisions, as would be expected from the lower nuclear levels of WRM-1 (Fig. 4B, arrowheads). Conversely, we found that WRM-1 levels were significantly higher in the anterior daughters of *apr-1(RNAi)* seam cells compared with those of controls, similar to the reported phenotype in the T seam cell division (Fig. 4A,C; Mizumoto and Sawa, 2007). Although KIN-19 and APR-1 have similar roles in SYS-1 regulation, it appears that their roles in regulating nuclear WRM-1 levels are distinct.

Because APR-1 and KIN-19 regulate WRM-1 (Fig. 4B–D), we also investigated whether PRY-1 has a role in the WRM-1 branch of the W $\beta$ A pathway. *pry-1(mu38)* larvae have been

previously shown to experience a delay in the establishment of GFP::WRM-1 cortical asymmetry during the earlier division of the V5.p seam cell, but this is eventually resolved, and the two daughter cells display proper asymmetric nuclear localization of WRM-1 (Mizumoto and Sawa, 2007). To determine whether this is the case in later seam cell divisions, we observed GFP::WRM-1 nuclear localization in *pry-1(mu38)* cells during late telophase of terminal V seam cell divisions.  $P_{worm-1}$ ::GFP::WRM-1 was used, as  $P_{scm}$ ::WRM-1::YFP expression was severely reduced in *pry-1(mu38)* worms (data not shown), likely because of transgene promoter differences.  $P_{worm-1}$ ::GFP::WRM-1 is a rescuing transgene that asymmetrically localizes to daughter cell nuclei; however, its lower expression levels compared with those of  $P_{scm}$ ::WRM-1::YFP generally make its use less desirable (Nakamura et al., 2005; Mizumoto and Sawa, 2007). In control worms, GFP::WRM-1 localized to seam cell daughter nuclei in the expected wild-type pattern in all observed divisions ( $n=30$ ) (Fig. 4E). However, in *pry-1(mu38)* worms, seam cell daughters displayed a reversed pattern of GFP::WRM-1 localization in 30% of observed divisions ( $n=20$ ; Fig. 4F). We conclude from this that PRY-1 controls the polarity of WRM-1 nuclear localization during terminal seam cell division, but that PRY-1 is unnecessary for WRM-1 nuclear export. Taken together with our SYS-1 data, these data indicate that PRY-1 controls the site of regulation of both SYS-1 and WRM-1, but that PRY-1 is dispensable for their respective destabilization or nuclear export.

### Changes in APR-1 localization do not necessarily correspond to disruption of SYS-1 nuclear asymmetry

KIN-19 regulates WRM-1 (Fig. 4), and, in the *C. elegans* embryo, nuclear levels of WRM-1 are regulated by microtubules in an APR-1-dependent manner (Sugioka et al., 2011). However, it is unknown whether KIN-19 regulates WRM-1 through APR-1, so we examined APR-1 localization after *kin-19 RNAi* treatment. In order to identify defective ACDs and to establish baseline timepoints for APR-1 comparison, we examined the colocalization of APR-1::YFP with mCherry::SYS-1. In control worms, expression of the rescuing transgenes *oslIs3* ( $P_{apr-1}$ ::APR-1::YFP) and *uiwIs4* ( $P_{sys-1}$ ::mCherry::SYS-1) led to significantly enriched APR-1 localization on the anterior cortex compared with the posterior cortex, and these animals also displayed the wild-type pattern of SYS-1 localization as

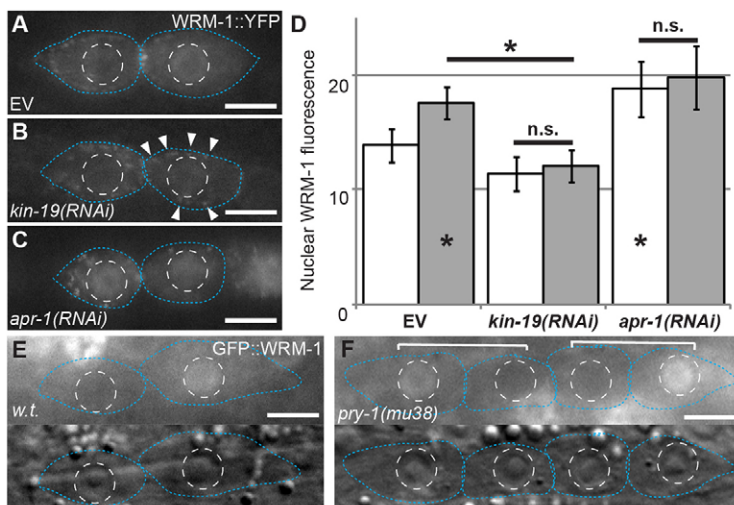

**Fig. 4. KIN-19 positively regulates posterior WRM-1 nuclear localization.** (A) WRM-1::YFP localization during late telophase in (A) empty-vector control cells (EV), (B) *kin-19(RNAi)* and (C) *apr-1(RNAi)* seam cell daughters. Blue dotted lines, cell boundaries; white dashed circles, nuclear boundaries; arrowheads, posterior cortical WRM-1 puncta. (D) Average nuclear WRM-1::YFP fluorescence intensity after telophase. White bars, anterior daughters; gray bars, posterior daughters. The  $n$  values are as follows: EV,  $n=43$ ; *kin-19(RNAi)*,  $n=33$ ; *apr-1(RNAi)*,  $n=17$ . Data show the mean  $\pm$  s.e.m.; \* $P < 0.05$ ; n.s.  $P > 0.05$ . Asterisks inside columns are a comparison to anterior empty-vector control. (E,F) GFP::WRM-1 nuclear localization in wild-type (w.t.)/WM75 (E) and *pry-1(mu38)* cells (F). White bars indicate daughter pairs. Scale bars: 5  $\mu$ m.

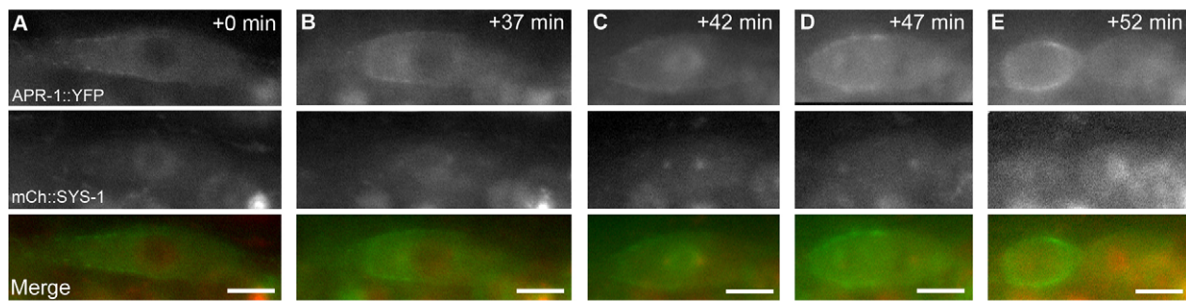

**Fig. 5. Reciprocal asymmetry of APR-1 and SYS-1 is achieved during telophase.** Timecourse of APR-1 and SYS-1 colocalization during seam cell division. (A) Prior to division. (B) Early metaphase. (C) Late metaphase. (D) Anaphase. (E) Early telophase. The timecourse indicates that APR-1 asymmetry precedes SYS-1 asymmetry and that APR-1 and SYS-1 asymmetries are best observed simultaneously during telophase. Top row, APR-1::YFP (green in merge). Middle row, SYS-1::mCherry (red in merge). Bottom row, merge. Time is indicated as the time since first exposure (+0 min) in minutes. Scale bars: 5  $\mu$ m.

described above ( $n=23$ ; Fig. 5; Fig. 6A,C). The timing of APR-1 and SYS-1 colocalization shows that SYS-1 asymmetry occurs after APR-1 asymmetry, consistent with APR-1-mediated regulation of SYS-1 (Fig. 5). When *osls13; uiwls4* worms were exposed to *kin-19(RNAi)*, a significant increase in cortical localization of APR-1::YFP was observed in both the anterior and posterior daughter cells ( $n=25$ ; Fig. 6B,F). For quantification of cortical levels of APR-1, the cortical domains of each daughter were delineated by hand based on fluorescence images, and it is likely that these domains included some cytoplasm. These values therefore likely underestimate the differences in cortical intensity. Therefore, in addition, we examined the average anterior-posterior difference in cortical APR-1 intensity, to highlight changes in asymmetry between daughters and treatments (Fig. 6G). From

these data, we conclude that: (1) the lower posterior nuclear levels of WRM-1 seen in *kin-19(RNAi)* can be attributed to the mislocalization of APR-1 to the posterior daughter during seam cell division, and (2) APR-1 that is mislocalized to the posterior cortex in the absence of KIN-19 cannot negatively regulate SYS-1 levels.

Loss of function of *wrm-1* results in lower levels of APR-1 on the anterior cortex of the seam cells during division (Mizumoto and Sawa, 2007), potentially providing an additional background against which the effects of APR-1 dysregulation during seam cell division can be investigated. To determine whether APR-1 mislocalization in this case affects SYS-1 localization, we examined the localization of APR-1::YFP and mCherry::SYS-1 in a temperature-sensitive *wrm-1* mutant, *ne1982ts*. At the

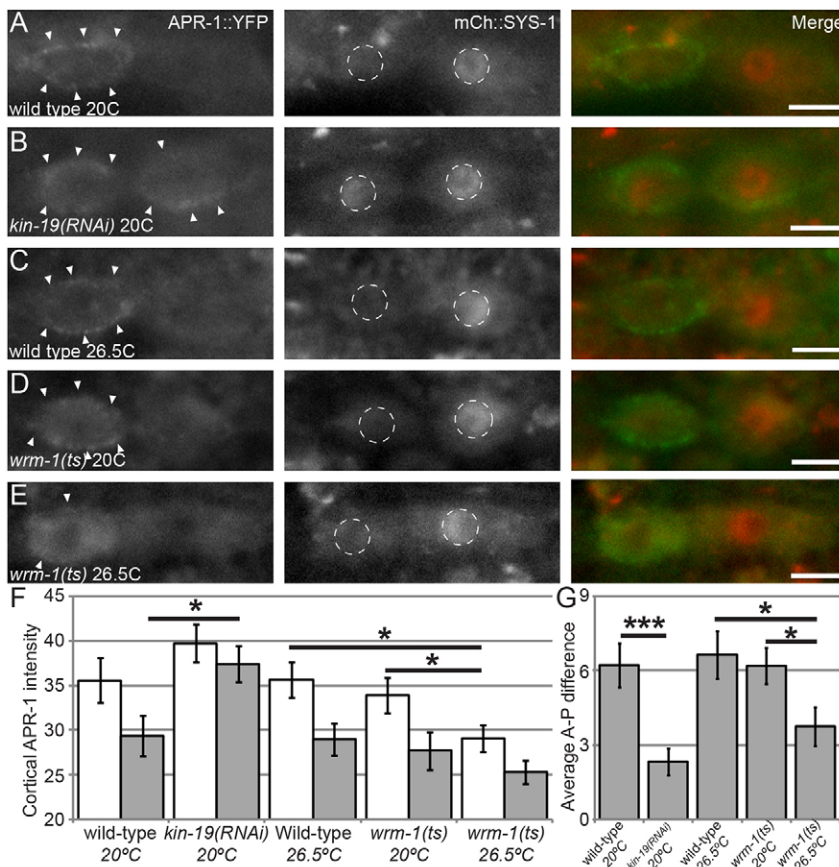

**Fig. 6. KIN-19 controls APR-1 and SYS-1 localization, whereas WRM-1 controls only APR-1.** All images show *osls13(APR-1::YFP); ulwls4(mCherry::SYS-1)*. (A) Wild-type control. Cortical APR-1::YFP (left, arrowheads; green in merge) and nuclear SYS-1::mCherry (center, white dashed circles; red in merge) display proper asymmetric localizations (merge on right). (B) *kin-19(RNAi)*. (C) Wild-type seam cell held at 26.5°C for 3 hours prior to division. (D) *wrm-1(ne1982)* at the permissive temperature of 20°C. (E) *wrm-1(ne1982)* at the restrictive temperature of 26.5°C for 3 hours prior to division. Reduced cortical levels of APR-1::YFP were observed but no changes in SYS-1 nuclear asymmetry were observed. Arrowheads, cortical APR-1 localization; white dashed circles, nuclei. Scale bars: 5  $\mu$ m. (F) Quantification of cortical APR-1::YFP fluorescence above backgrounds. White bars, anterior daughters; gray bars, posterior daughters. (G) Average anterior-posterior (A-P) difference in cortical APR-1::YFP fluorescence. *ts*, temperature sensitive. The  $n$  values are as follows: EV at 20°C,  $n=23$ ; *kin-19(RNAi)* at 20°C,  $n=24$ ; wild-type at 26.5°C,  $n=25$ ; *wrm-1(ne1982)* at 20°C,  $n=26$ ; *wrm-1(ne1982)* at 26.5°C,  $n=28$ . Data show the mean  $\pm$  s.e.m.; \* $P<0.05$ ; \*\*\* $P<0.001$ .

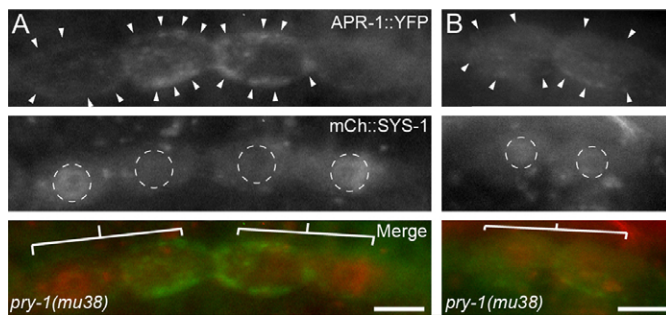

**Fig. 7. Defective APR-1 localization in *pry-1(mu38)* correlates with defective SYS-1 localization.** (A) Representative images of APR-1::YFP (green in merge) and SYS-1::mCherry (red in merge) localization in *pry-1(mu38)* seam cell daughters during late telophase. The leftmost pair of cells represents a reversal of both APR-1 and SYS-1 asymmetry. The rightmost pair represents a wild-type localization pattern for APR-1 and SYS-1. (B) Seam cell division in *pry-1(mu38)* in which cortical APR-1 and nuclear SYS-1 are symmetric between daughters. Arrowheads, enriched cortical APR-1; white dashed circles, nuclei; white bars, daughter pairs. Scale bars: 5  $\mu$ m.

permissive temperature of 20°C, we found that cortical levels of APR-1 were significantly higher in the anterior daughter compared with the posterior daughter, while wild-type SYS-1 asymmetry was observed in all divisions ( $n=26$ ; Fig. 6D,F,G). When *wrm-1(ne1982)* larvae were held at 26.5°C for 3 hours prior to the final seam cell division, we found that anterior cortical levels of APR-1 were significantly reduced compared with those of anterior daughters of larvae held at the permissive temperature ( $P<0.05$ , Mann-Whitney test), whereas wild-type SYS-1 asymmetry was still observed in all divisions ( $n=28$ ; Fig. 6E–G). Wild-type worms held at 26.5°C for 3 hours prior to division displayed no defects in cortical APR-1 asymmetry ( $n=25$ ; Fig. 6C,F,G). We conclude from these data that mislocalization of APR-1 as a result of the loss of *wrm-1* function does not translate into defects in SYS-1 localization.

To determine whether the SYS-1 polarity defect observed in *pry-1(mu38)* seam cells was correlated with APR-1 mislocalization, we examined APR-1 and SYS-1 localization in *pry-1(mu38)* animals. *pry-1(mu38); osIs13; uiwIs4* worms displayed enriched APR-1 on the posterior cortex in 29% of observed divisions – a reversal of the wild-type pattern ( $n=28$ ; Fig. 7A,B). This abnormal pattern of APR-1::YFP localization was established during metaphase and was maintained after division was completed (supplementary material Fig. S4). In *pry-1(mu38)* seam cell divisions that had abnormally localized APR-1, SYS-1 was mislocalized in 88% of observed divisions ( $n=8$ ), whereas 100% of the divisions in wild-type worms displayed wild-type patterns of APR-1 and SYS-1 localization ( $n=23$ ) ( $P<0.0001$ , Fisher's exact test). Thus, in contrast to the loss of WRM-1 and KIN-19, defects in APR-1 localization in *pry-1* mutants correspond to defects in SYS-1 levels, and we conclude that the randomization of SYS-1 asymmetry seen in *pry-1* mutants is due to defects in APR-1 localization. Additionally, as we observed an instance in which cortical APR-1 was essentially symmetrical between both daughters in addition to examples of reversals of polarity (Fig. 7B), the lower average levels of SYS-1 in *pry-1(mu38)* nuclei (Fig. 3C) might be related to more variable average cortical levels of APR-1 in both daughter cells.

## DISCUSSION

Here, we have identified an additional role of APR-1/APC during the asymmetric division of *C. elegans* seam cells, beyond its role in regulating WRM-1/ $\beta$ -catenin nuclear export; in a conserved fashion across metazoans, APR-1 controls the localization of SYS-1/ $\beta$ -catenin during asymmetric divisions of the epithelial stem cells of *C. elegans*. We have shown that the CK1 $\alpha$  homolog KIN-19 cooperates with APR-1/APC to negatively regulate seam cell fate through SYS-1, but that KIN-19 also positively regulates WRM-1 levels, likely through regulation of APR-1/APC. These two functions of APR-1/APC operate in the same asymmetrically dividing cell and are differentially regulated by KIN-19. We show that PRY-1/Axin is dispensable for the negative regulation of the nuclear levels of SYS-1 and WRM-1, but that PRY-1 is necessary for the proper localization of the complexes regulating SYS-1 and those regulating WRM-1 during ACD. Taken together, these results (summarized in Fig. 8A) provide the major framework for understanding APR-1/APC-mediated regulation of the nuclear localization of both SYS-1 and WRM-1 in W $\beta$ A-dependent cell divisions. In addition, these results provide new perspectives on the functions of conserved members of the  $\beta$ -catenin destruction complex and how the function of these proteins might be regulated during ACD.

It remains unclear how APC localization is regulated during Wnt signaling in general and during Wnt-induced ACD specifically. Instead of a complex that is co-regulated by upstream Wnt pathway factors, the novel *pry-1* mutant phenotype demonstrates that PRY-1/Axin controls the localization of at least one other destruction complex member, APR-1/APC. Although Axin is generally thought of as necessary for  $\beta$ -catenin degradation, PRY-1 is not required for reductions in SYS-1 levels. Instead, PRY-1 regulates the polarity of SYS-1 asymmetry during terminal seam cell division, through its control of APR-1. It is still unclear how Wnt signaling polarizes PRY-1 itself, although repressive interactions with asymmetrically localized Dishevelled proteins (Mizumoto and Sawa, 2007) seem a likely candidate. The observation that SYS-1 is, on average, positively regulated by PRY-1 suggests that APR-1 localization or activity is expanded in *pry-1* mutants. Previous work has shown that cortical APR-1 is symmetric in *pry-1(mu38)* cells prior to division of the V5.p seam cell, and that PRY-1 does not regulate the nuclear localization of WRM-1 during this same division (Mizumoto and Sawa, 2007). However, our data show that, in later divisions (equivalent to Vn.pppp), loss of *pry-1* function results in reversals of APR-1 cortical asymmetry, in addition to a reduced frequency of cortical symmetry, and that PRY-1 regulates the polarity of both SYS-1 and WRM-1 nuclear localization. This difference could be explained by differences in the lineages. The V5.p division occurs at the same time as the other Vn.p divisions; however, the anterior daughter of V5.p takes on a unique lineage that results in the birth of the PDE and PVD neurons, whereas the other Vn.pa cells continue the stereotyped seam cell lineage. Interestingly, although the Vn.p divisions (with the exception of V5.p) result in two seam cell daughters, it has been reported that APR-1, POP-1 and WRM-1 are all asymmetrically localized during this apparently cell-fate-symmetric division (Wildwater et al., 2011; Hughes et al., 2013). How the function and regulation of W $\beta$ A signaling is different between the Vn.p division and the later seam cell divisions represents an interesting area of further study to determine how the function of Wnt signaling might change within a single stem cell lineage over time. Because *pry-1(mu38)* is a nonsense



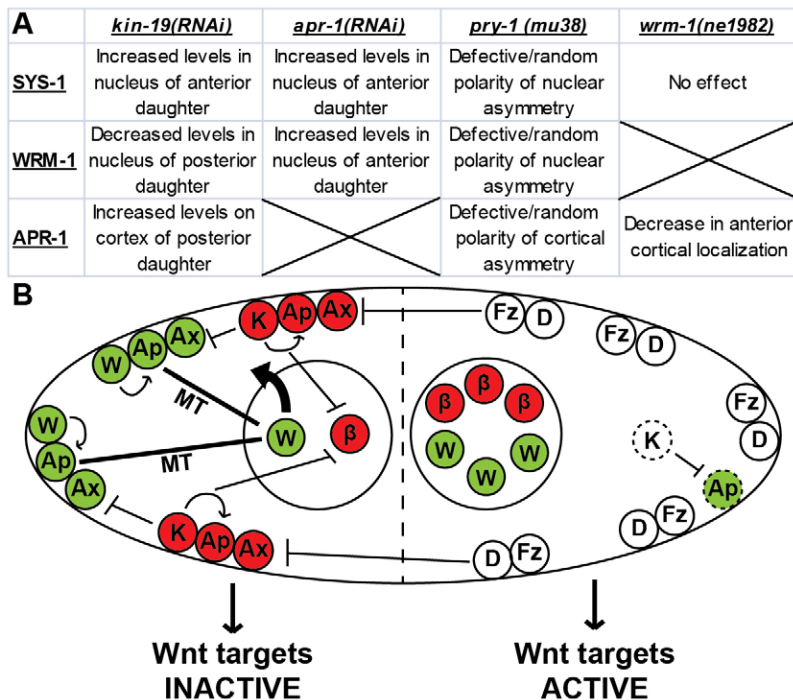

**Fig. 8. Proposed model for SYS-1 destruction during seam cell division.** (A) Table summarizing main findings.

Columns indicate the loss-of-function treatment, rows indicate the protein localization affected. (B) Model for  $\beta$ -catenin regulation in the seam cells of a wild-type worm. Two distinct pools of APR-1 are present at the anterior cortex, a microtubule (MT)-associated WRM-1-regulating pool (shown in green) and a KIN-19- and PRY-1-associated SYS-1-regulating pool (shown in red). KIN-19 inhibits posterior cortical localization of APR-1, thereby removing it from the posterior daughter (dashed outlines).  $\beta$ , SYS-1/ $\beta$ -catenin (red); W, WRM-1/ $\beta$ -catenin (green); Ax, SYS-1-regulating PRY-1/Axin (red); Ax, WRM-1-regulating PRY-1/Axin (green); Ap, SYS-1-regulating APR-1/APC (red); Ap, WRM-1-regulating APR-1/APC (green); K, KIN-19/CKI $\alpha$  (red); Fz, Frizzled (white); D, Disheveled (white).

mutation that is present in each seam cell nucleus through each of their several divisions, it is also of interest that some *mu38* seam cells still divide with a wild-type polarity of Wnt signaling components, consistent with our conclusion that PRY-1 loss randomizes the polarity of the mother cell.

The finding that KIN-19 regulates both SYS-1 and WRM-1 asymmetry was unexpected. Our KIN-19 phenotypic analysis shows that KIN-19 has a positive role in WRM-1 nuclear localization and a negative role in regulating SYS-1 levels, in addition to its previously known negative role in fate determination of seam cells (Banerjee et al., 2010; Gleason and Eisenmann, 2010). The observation that KIN-19 regulates SYS-1, WRM-1 and APR-1 begs the question of whether any of these proteins are directly phosphorylated by KIN-19. We identified several CKI consensus phosphorylation sites in SYS-1, WRM-1 and APR-1 but, given the relative commonality of this sequence, more work is required to determine the significance of these sites. Our discovery that KIN-19 regulates cortical APR-1 polarity provides a starting point for future research questions, such as whether the APR-1 that is localized by KIN-19 is functionally distinct from the APR-1 that is localized by WRM-1. How does Wnt signaling distinguish between the functions of APR-1 in such a situation? *pry-1(mu38)* seam cells display markedly different SYS-1 and WRM-1 localization phenotypes compared with those of *kin-19(RNAi)* cells, despite the fact that *pry-1* and *kin-19* both display APR-1 localization defects. If PRY-1 and KIN-19 both regulate cortical asymmetry of APR-1, why are the resultant phenotypes in SYS-1 and WRM-1 localization so dissimilar?

We propose a reconciling model in which KIN-19/CKI $\alpha$  and WRM-1/ $\beta$ -catenin subdivide APR-1/APC into two distinct pools: a WRM-1-regulating pool and a SYS-1-regulating pool. In the first pool, APR-1 functions in WRM-1 regulation through association with microtubules at the cortex (Sugioka et al., 2011). In a second pool, entry into which appears to be dependent on KIN-19, APR-1 reduces SYS-1 levels. This model predicts that *kin-19(RNAi)* results in changes in SYS-1 and WRM-1

localization because KIN-19 loss results in a single WRM-1-regulating pool of APR-1. Loss of KIN-19 also increases the level of WRM-1-regulating APR-1 at the posterior cortex, so we hypothesize that KIN-19 normally restricts this pool of APR-1 to the cytoplasm. *wrm-1(ne1982)* also reduces the amount of anterior cortical APR-1 but does not affect SYS-1 nuclear asymmetry, further demonstrating that the WRM-1- and SYS-1-regulating functions of APR-1 are regulated separately. Previous experiments in mammalian tissue culture have indicated that CKI-dependent phosphorylation of APC greatly increases its affinity for  $\beta$ -catenin (Rubinfeld et al., 2001; Ha et al., 2004), suggesting that KIN-19-dependent phosphorylation of APR-1 might act as a switch between APR-1-mediated regulation of WRM-1 (through microtubules) or SYS-1 (through direct interaction). A graphical representation of this model is shown in Fig. 8B.

One caveat to our current model is that it is still unclear exactly where APR-1 localizes when it is engaged in the negative regulation of SYS-1. *wrm-1(ts)* mutants show wild-type SYS-1 asymmetry and loss of much, but not all, of the APR-1 from the cortex, suggesting that SYS-1 could be regulated by cytoplasmic APR-1 that is somehow qualitatively different from the cytoplasmic APR-1 in the posterior daughter. However, we see no difference in APR-1 cytoplasmic levels in the two wild-type daughter cells that display SYS-1 asymmetry or in *pry-1* mutants that have defective cortical APR-1 asymmetry and corresponding defective SYS-1 regulation. We therefore prefer our simpler model of cortical APR-1 having a potent effect on SYS-1 negative regulation. However, if cytoplasmic APR-1 does regulate SYS-1, this further reinforces our overall conclusion that WRM-1 and SYS-1 are regulated by different pools of APR-1; if APR-1 is removed from the cortex and can still regulate SYS-1 levels in the anterior daughter cell, then the localization and function of SYS-1-regulating APR-1 must be distinct from those of WRM-1-regulating APR-1 that localizes to the cortex.

The ability of APR-1 to promote nuclear retention of SYS-1 in the anterior daughter cell is intriguing, given the negative nuclear role for mammalian APC in the expression of Wnt target genes (Neufeld, 2009). Vertebrate APC competes with TCF for binding to nuclear  $\beta$ -catenin as a mechanism to restrict the aberrant activation of Wnt target genes (Neufeld et al., 2000), suggesting that the apparent nuclear anchoring of SYS-1 by APR-1 might be an effect of competition for SYS-1 binding between nuclear APR-1 and POP-1. Alternatively, APR-1 might inhibit the interaction of SYS-1 with an as-yet-unknown protein that functions to export SYS-1 from the nucleus of the anterior seam cell daughter. Our results from the *pry-1(mu38); apr-1(RNAi)* double loss-of-function experiments indicate that this mechanism is also polarized by the function of PRY-1. Future work will examine the role of nuclear APC in *C. elegans* and determine whether nuclear APC localization is required for nuclear  $\beta$ -catenin retention in mammals.

The role of SYS-1 in the transcriptional activation of TCF target genes and its regulation at the level of protein stability make it a useful model for the study of mammalian  $\beta$ -catenin, in part because SYS-1 lacks a potentially confounding adhesive function. Although the function of WRM-1 is not conserved in mammalian  $\beta$ -catenin, the fact that the localization of the former is controlled by APC means that WRM-1 localization can serve as a proxy for APC function, the regulation of which is complex in both mammals and *C. elegans*. A recent *in vitro* study has shown that asymmetric presentation of Wnt protein results in asymmetric localization of APC and  $\beta$ -catenin, as well as asymmetric cell fate specification in mouse embryonic stem cells (Habib et al., 2013). A similar mechanism for Wnt-induced asymmetric division and cell fate acquisition has been proposed to occur in the mammalian intestinal crypt (Quyn et al., 2010; Bellis et al., 2012), although ACD in this tissue is difficult to observe *in vivo*. Studying the regulation of SYS-1, WRM-1 and APR-1 in the *C. elegans* seam cells thus provides an *in vivo* opportunity for understanding the regulation of  $\beta$ -catenin and APC in Wnt signaling during ACD that is currently lacking in other systems. To our knowledge, this is the first *in vivo* evidence indicating that Wnt signaling components can distinguish between multiple functions of APC simultaneously and in the same cell. We believe that the *C. elegans* seam cells provide a powerful system that can be used to address the multiple functions of APC and how they are regulated *in vivo*.

## MATERIALS AND METHODS

### Strains

The *C. elegans* strains used in this study were: (1) BTP1 [*qIs95 (P<sub>sys-1</sub>::VENUS::SYS-1) III*], (2) BTP117 [*pry-1(mu38) I; qIs95 III*], (3) BTP118 [*unc-76(e911) V; osIs13(P<sub>apr-1</sub>::APR-1::VENUS; unc-76 (+)), uiwIs4 (P<sub>sys-1</sub>::mCherry::SYS-1)*], (4) BTP119 [*pry-1(mu38) I; unc-76(e911); osIs13; uiwIs4*], (5) BTP126 [*wrm-1(ne1982) III; osIs13; uiwIs4*], (6) BTP128 [*uiwIs4; P<sub>scm</sub>::GFP:: $\beta$ -tubulin*], (7) BTP132 [*pry-1(mu38) I; nels2 (p<sub>wrm-1</sub>::GFP::WRM-1; pRF4(rol-6)) IV*], (8) BTP142 [*wrm-1(ne1982) III; wIs51(P<sub>scm</sub>::GFP)*], (9) HS1325 [*unc-76(e911) V; osEx229(P<sub>pry-1</sub>::pry-1::GFP+unc-76(+))*], (10) HS1417 [*osIs5 (P<sub>scm</sub>::WRM-1::VENUS) II*], (11) JR667 [*unc-119(e2498::Tc1) III; wIs51(P<sub>scm</sub>::GFP) V*] and (12) WM75 [*wrm-1(tm514) III; nels2 IV*].

### Larvae analysis

RNAi was performed using standard techniques using the pL4440 feeding vector (Timmons et al., 2001). *apr-1+kin-19(RNAi)* was performed by inserting sequences homologous to both *apr-1* and *kin-19* RNA into a single RNAi vector, as described previously (Min et al., 2010). Synchronized L1 worms were grown at 20°C until late L3, when

the terminal seam cell division occurs. L3 worms were then immobilized using 10  $\mu$ M muscimol on 6% agarose pads for live imaging. Cells and their corresponding nuclei were identified by differential interference contrast (DIC) microscopy prior to fluorescence image capture (see Fig. 2). The *n* values refer to the number of daughter pairs imaged and compared.

RNAi efficacy was quantified by semi-quantitative RT-PCR, with mRNA decreases ranging from 73–80%. RNAi was further validated by feeding RNAi to worms expressing the seam cell marker *P<sub>scm</sub>::GFP*. We observed increases in seam cell number similar to those reported previously for RNAi-mediated knockdown of *kin-19* and *apr-1* (Banerjee et al., 2010; Gleason and Eisenmann, 2010). RNAi-mediated knockdown of *apr-1* was additionally validated by performing knockdown in worms expressing APR-1::YFP. The expression of APR-1::YFP was visibly eliminated in these larvae.

In the *wrm-1(ne1982)* temperature-shift experiment, temperature-shifted worms were held at 20°C until 3 hours prior to division, when they were shifted to the restrictive temperature of 26.5°C (Gleason and Eisenmann, 2010). The average number of seam cells in *wrm-1(ne1982)* mutants was  $15.7 \pm 0.12$  ( $n=20$ ,  $\pm$ s.e.m.) at 20°C and was significantly reduced to  $12.2 \pm 0.57$  ( $n=20$ ) in worms that were shifted to 26.5°C 3 hours before their final division, indicating that our temperature-shift regimen was sufficient to affect cell fate ( $P<0.0001$ , Mann-Whitney test).

### Fluorescence quantification

Images were obtained using a Zeiss Axioplan compound fluorescent microscope and Zeiss Axiovision software. Raw YFP image data was exported into TIFF format and analyzed using ImageJ software. Nuclei, bodies and cortices of seam cells were identified in DIC images and then the mean protein fluorescence in fluorescence images was quantified using ImageJ. Background fluorescence was normalized for each experiment by using the same channels and exposures to image seam cells in N2 wild-type worms ( $n=14$  for each exposure setting). All statistical comparisons were performed with either Fisher's Exact test or the Mann-Whitney test and VassarStats software (Lowry, 2010).

### Acknowledgements

We thank the following colleagues from the University of Iowa, IA: Lori Adams, Diane Slusarski, Doug Houston and Sarit Smolikove for helpful comments. We also thank Hitoshi Sawa (National Institute of Genetics, Mishima, Shizuoka, Japan) and Sander van den Heuvel (Utrecht University, Utrecht, The Netherlands) for the *osIs13* transgene and Mike Herman (Kansas State University, Manhattan, KS) for *P<sub>scm</sub>::GFP:: $\beta$ -tubulin*. Some strains were provided by the Caenorhabditis Genetics Center, which is funded by the National Institutes of Health Office of Research Infrastructure Programs [grant number P40 OD010440].

### Competing interests

The authors declare no competing interests.

### Author contributions

A.T.B. designed experiments, performed experiments and prepared the manuscript. B.T.P. designed experiments and prepared the manuscript.

### Funding

This work was supported by research grants from the March of Dimes Foundation [grant number 5-FY11-109]; and from the American Cancer Society [grant number RSG-11-140-01-DDC].

### Supplementary material

Supplementary material available online at <http://jcs.biologists.org/lookup/suppl/doi:10.1242/jcs.146514/-DC1>

### References

- Banerjee, D., Chen, X., Lin, S. Y. and Slack, F. J. (2010). *kin-19*/casein kinase I $\alpha$  has dual functions in regulating asymmetric division and terminal differentiation in *C. elegans* epidermal stem cells. *Cell Cycle* **9**, 4748–4765.
- Barth, A. I. M., Caro-Gonzalez, H. Y. and Nelson, W. J. (2008). Role of adenomatous polyposis coli (APC) and microtubules in directional cell migration and neuronal polarization. *Semin. Cell Dev. Biol.* **19**, 245–251.
- Bellis, J., Duluc, I., Romagnolo, B., Perret, C., Faux, M. C., Dujardin, D., Formstone, C., Lightowler, S., Ramsay, R. G., Freund, J.-N. et al. (2012). The

- tumor suppressor Apc controls planar cell polarities central to gut homeostasis. *J. Cell Biol.* **198**, 331–341.
- Brocardo, M. and Henderson, B. R.** (2008). APC shuttling to the membrane, nucleus and beyond. *Trends Cell Biol.* **18**, 587–596.
- Cicalese, A., Bonizzi, G., Pasi, C. E., Faretta, M., Ronzoni, S., Giulini, B., Briskin, C., Minucci, S., Di Fiore, P. P. and Pelicci, P. G.** (2009). The tumor suppressor p53 regulates polarity of self-renewing divisions in mammary stem cells. *Cell* **138**, 1083–1095.
- Clevers, H. and Nusse, R.** (2012). Wnt/ $\beta$ -catenin signaling and disease. *Cell* **149**, 1192–1205.
- Gleason, J. E. and Eisenmann, D. M.** (2010). Wnt signaling controls the stem cell-like asymmetric division of the epithelial seam cells during *C. elegans* larval development. *Dev. Biol.* **348**, 58–66.
- Gorrepati, L., Thompson, K. W. and Eisenmann, D. M.** (2013). *C. elegans* GATA factors EGL-18 and ELT-6 function downstream of Wnt signaling to maintain the progenitor fate during larval asymmetric divisions of the seam cells. *Development* **140**, 2093–2102.
- Green, R. A. and Kaplan, K. B.** (2003). Chromosome instability in colorectal tumor cells is associated with defects in microtubule plus-end attachments caused by a dominant mutation in APC. *J. Cell Biol.* **163**, 949–961.
- Ha, N.-C., Tonzuka, T., Stamos, J. L., Choi, H.-J. and Weis, W. I.** (2004). Mechanism of phosphorylation-dependent binding of APC to  $\beta$ -catenin and its role in  $\beta$ -catenin degradation. *Mol. Cell* **15**, 511–521.
- Habib, S. J., Chen, B.-C., Tsai, F.-C., Anastassiadis, K., Meyer, T., Betzig, E. and Nusse, R.** (2013). A localized Wnt signal orients asymmetric stem cell division in vitro. *Science* **339**, 1445–1448.
- Harterink, M., Kim, D. H., Middelkoop, T. C., Doan, T. D., van Oudenaarden, A. and Korswagen, H. C.** (2011). Neuroblast migration along the anteroposterior axis of *C. elegans* is controlled by opposing gradients of Wnts and a secreted Frizzled-related protein. *Development* **138**, 2915–2924.
- Horvitz, H. R. and Herskowitz, I.** (1992). Mechanisms of asymmetric cell division: two Bs or not two Bs, that is the question. *Cell* **68**, 237–255.
- Huang, S., Shetty, P., Robertson, S. M. and Lin, R.** (2007). Binary cell fate specification during *C. elegans* embryogenesis driven by reiterated reciprocal asymmetry of TCF POP-1 and its coactivator  $\beta$ -catenin SYS-1. *Development* **134**, 2685–2695.
- Huang, X., Tian, E., Xu, Y. and Zhang, H.** (2009). The *C. elegans* engrailed homolog *ceh-16* regulates the self-renewal expansion division of stem cell-like seam cells. *Dev. Biol.* **333**, 337–347.
- Hughes, S., Brabin, C., Appleford, P. J. and Woollard, A.** (2013). CEH-20/Pbx and UNC-62/Meis function upstream of *mnt-1/Runx* to regulate asymmetric divisions of the *C. elegans* stem-like seam cells. *Biology Open* **6**, 20134549.
- Jackson, B. M. and Eisenmann, D. M.** (2012).  $\beta$ -catenin-dependent Wnt signaling in *C. elegans*: teaching an old dog a new trick. *Cold Spring Harb. Perspect. Biol.* **4**, a007948.
- Kanamori, T., Inoue, T., Sakamoto, T., Gengyo-Ando, K., Tsujimoto, M., Mitani, S., Sawa, H., Aoki, J. and Arai, H.** (2008).  $\beta$ -catenin asymmetry is regulated by PLA1 and retrograde traffic in *C. elegans* stem cell divisions. *EMBO J.* **27**, 1647–1657.
- Khrantsov, A. I., Khrantsova, G. F., Tretiakova, M., Huo, D., Olopade, O. I. and Goss, K. H.** (2010). Wnt/ $\beta$ -catenin pathway activation is enriched in basal-like breast cancers and predicts poor outcome. *Am. J. Pathol.* **176**, 2911–2920.
- Kidd, A. R., III, Miskowski, J. A., Siegfried, K. R., Sawa, H. and Kimble, J.** (2005). A  $\beta$ -catenin identified by functional rather than sequence criteria and its role in Wnt/MAPK signaling. *Cell* **121**, 761–772.
- Knoblich, J. A.** (2008). Mechanisms of asymmetric stem cell division. *Cell* **132**, 583–597.
- Korswagen, H. C., Herman, M. A. and Clevers, H. C.** (2000). Distinct  $\beta$ -catenins mediate adhesion and signalling functions in *C. elegans*. *Nature* **406**, 527–532.
- Korswagen, H. C., Coudreuse, D. Y. M., Betist, M. C., van de Water, S., Zivkovic, D. and Clevers, H. C.** (2002). The Axin-like protein PRY-1 is a negative regulator of a canonical Wnt pathway in *C. elegans*. *Genes Dev.* **16**, 1291–1302.
- Lo, M.-C., Gay, F., Odum, R., Shi, Y. and Lin, R.** (2004). Phosphorylation by the  $\beta$ -catenin/MAPK complex promotes 14-3-3-mediated nuclear export of TCF/POP-1 in signal-responsive cells in *C. elegans*. *Cell* **117**, 95–106.
- Lowry, R.** (2010). *VassarStats*. Available at: <http://vassarstats.net/index.html>.
- MacDonald, B. T., Tamai, K. and He, X.** (2009). Wnt/ $\beta$ -catenin signaling: components, mechanisms, and diseases. *Dev. Cell* **17**, 9–26.
- Min, K., Kang, J. and Lee, J.** (2010). A modified feeding RNAi method for simultaneous knock-down of more than one gene in *Caenorhabditis elegans*. *Biotechniques* **48**, 229–232.
- Mizumoto, K. and Sawa, H.** (2007). Cortical  $\beta$ -catenin and APC regulate asymmetric nuclear  $\beta$ -catenin localization during asymmetric cell division in *C. elegans*. *Dev. Cell* **12**, 287–299.
- Morrison, S. J. and Kimble, J.** (2006). Asymmetric and symmetric stem-cell divisions in development and cancer. *Nature* **441**, 1068–1074.
- Nakamura, M., Zhou, X. Z. and Lu, K. P.** (2001). Critical role for the EB1 and APC interaction in the regulation of microtubule polymerization. *Curr. Biol.* **11**, 1062–1067.
- Nakamura, K., Kim, S., Ishidate, T., Bei, Y., Pang, K., Shirayama, M., Trzepacz, C., Brownell, D. R. and Mello, C. C.** (2005). Wnt signaling drives WRM-1/ $\beta$ -catenin asymmetries in early *C. elegans* embryos. *Genes Dev.* **19**, 1749–1754.
- Neufeld, K. L.** (2009). Nuclear APC. *Adv. Exp. Med. Biol.* **656**, 13–29.
- Neufeld, K. L., Nix, D. A., Bogerd, H., Kang, Y., Beckerle, M. C., Cullen, B. R. and White, R. L.** (2000). Adenomatous polyposis coli protein contains two nuclear export signals and shuttles between the nucleus and cytoplasm. *Proc. Natl. Acad. Sci. USA* **97**, 12085–12090.
- Neumüller, R. A. and Knoblich, J. A.** (2009). Dividing cellular asymmetry: asymmetric cell division and its implications for stem cells and cancer. *Genes Dev.* **23**, 2675–2699.
- Phillips, B. T. and Kimble, J.** (2009). A new look at TCF and  $\beta$ -catenin through the lens of a divergent *C. elegans* Wnt pathway. *Dev. Cell* **17**, 27–34.
- Phillips, B. T., Kidd, A. R., 3rd, King, R., Hardin, J. and Kimble, J.** (2007). Reciprocal asymmetry of SYS-1/ $\beta$ -catenin and POP-1/TCF controls asymmetric divisions in *Caenorhabditis elegans*. *Proc. Natl. Acad. Sci. USA* **104**, 3231–3236.
- Powell, A. E., Shung, C.-Y., Saylor, K. W., Müllendorff, K. A., Weiss, J. B. and Wong, M. H.** (2010). Lessons from development: A role for asymmetric stem cell division in cancer. *Stem Cell Res.* **4**, 3–9.
- Price, M. A.** (2006). CKI, there's more than one: casein kinase I family members in Wnt and Hedgehog signaling. *Genes Dev.* **20**, 399–410.
- Quyn, A. J., Appleton, P. L., Carey, F. A., Steele, R. J. C., Barker, N., Clevers, H., Ridgway, R. A., Sansom, O. J. and Näthke, I. S.** (2010). Spindle orientation bias in gut epithelial stem cell compartments is lost in precancerous tissue. *Cell Stem Cell* **6**, 175–181.
- Ren, H. and Zhang, H.** (2010). Wnt signaling controls temporal identities of seam cells in *Caenorhabditis elegans*. *Dev. Biol.* **345**, 144–155.
- Reya, T. and Clevers, H.** (2005). Wnt signalling in stem cells and cancer. *Nature* **434**, 843–850.
- Rochelleau, C. E., Yasuda, J., Shin, T. H., Lin, R., Sawa, H., Okano, H., Priess, J. R., Davis, R. J. and Mello, C. C.** (1999). WRM-1 activates the LIT-1 protein kinase to transduce anterior/posterior polarity signals in *C. elegans*. *Cell* **97**, 717–726.
- Rubinfeld, B., Tice, D. A. and Polakis, P.** (2001). Axin-dependent phosphorylation of the adenomatous polyposis coli protein mediated by casein kinase 1 $\epsilon$ . *J. Biol. Chem.* **276**, 39037–39045.
- Sawa, H.** (2012). Control of cell polarity and asymmetric division in *C. elegans*. *Curr. Top. Dev. Biol.* **101**, 55–76.
- Sugioka, K., Mizumoto, K. and Sawa, H.** (2011). Wnt regulates spindle asymmetry to generate asymmetric nuclear  $\beta$ -catenin in *C. elegans*. *Cell* **146**, 942–954.
- Timmons, L., Court, D. L. and Fire, A.** (2001). Ingestion of bacterially expressed dsRNAs can produce specific and potent genetic interference in *Caenorhabditis elegans*. *Gene* **263**, 103–112.
- Wildwater, M., Sander, N., de Vreede, G. and van den Heuvel, S.** (2011). Cell shape and Wnt signaling redundantly control the division axis of *C. elegans* epithelial stem cells. *Development* **138**, 4375–4385.
- Yamamoto, Y., Takeshita, H. and Sawa, H.** (2011). Multiple Wnts redundantly control polarity orientation in *Caenorhabditis elegans* epithelial stem cells. *PLoS Genet.* **7**, e1002308.
- Yang, X.-D., Huang, S., Lo, M.-C., Mizumoto, K., Sawa, H., Xu, W., Robertson, S. and Lin, R.** (2011). Distinct and mutually inhibitory binding by two divergent  $\beta$ -catenins coordinates TCF levels and activity in *C. elegans*. *Development* **138**, 4255–4265.
- Zumbrunn, J., Kinoshita, K., Hyman, A. A. and Näthke, I. S.** (2001). Binding of the adenomatous polyposis coli protein to microtubules increases microtubule stability and is regulated by GSK3  $\beta$  phosphorylation. *Curr. Biol.* **11**, 44–49.
